# Supplementary material
Source: Springer Nature journal article supplement (https://www.springermedizin.de/resource/supplementary/12889_2007_1118_MOESM2_ESM.pdf/9502490)
Supplement: MOESM2 [file 9502490]

# Age group Men

## 35-39

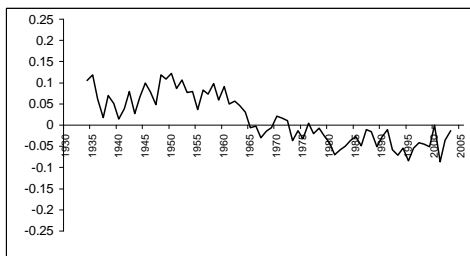

## 40-44

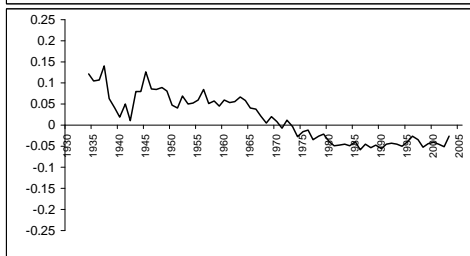

## 45-49

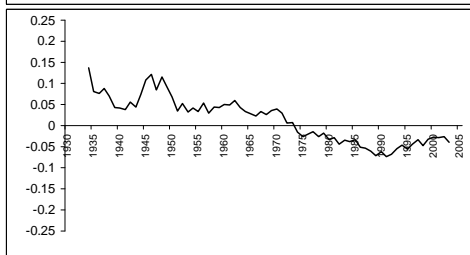

## 50-54

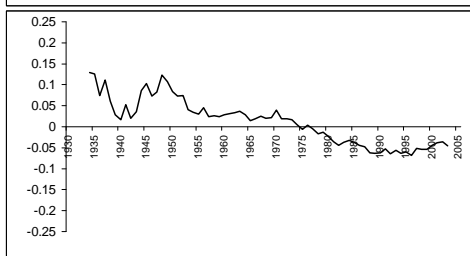

## 55-59

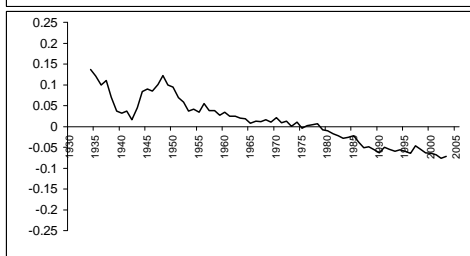

## 60-64

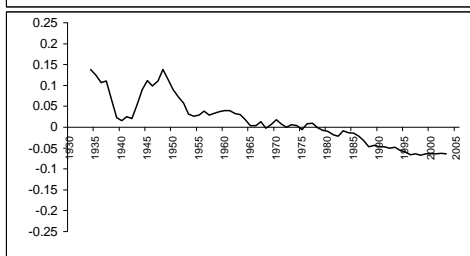

Proportional change, 5 year moving average

# Women

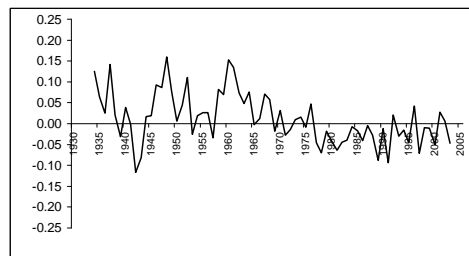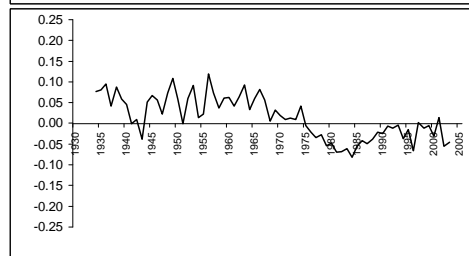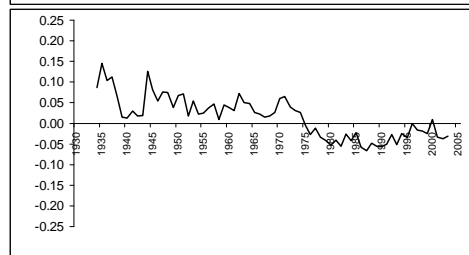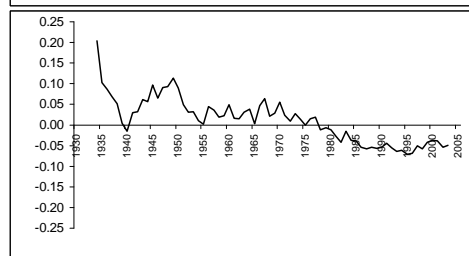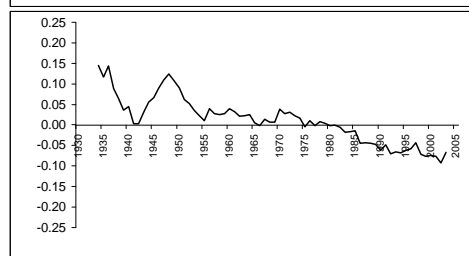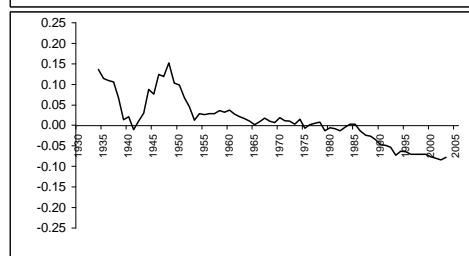

Proportional change, 5 year moving average
